# Supplementary material
Source: MDPI journal article supplement (https://www.mdpi.com/2073-4344/12/10/1185)
Supplement: s1 [file s1]

Supporting information

# Visible light-Responsive CeO<sub>2</sub>/MoS<sub>2</sub> composite for photocatalytic hydrogen production

Anuja A. Yadav <sup>1,†</sup>, Yuvaraj M. Hunge <sup>2,\*</sup> and Seok-Won Kang <sup>1,\*</sup>

<sup>1</sup> Department of Automotive Engineering, Yeungnam University, 280 Daehak-ro, Gyeongsan 38541, Korea

<sup>2</sup> Division of Biotechnology, Daegu Gyeongbuk Institute of Science and Technology (DGIST), Daegu 42988, Korea

\* Correspondence: yuvihunge@gmail.com (Y.M.H.); swkang@yu.ac.kr (S.-W.K.)

† These authors contributed equally to this work.

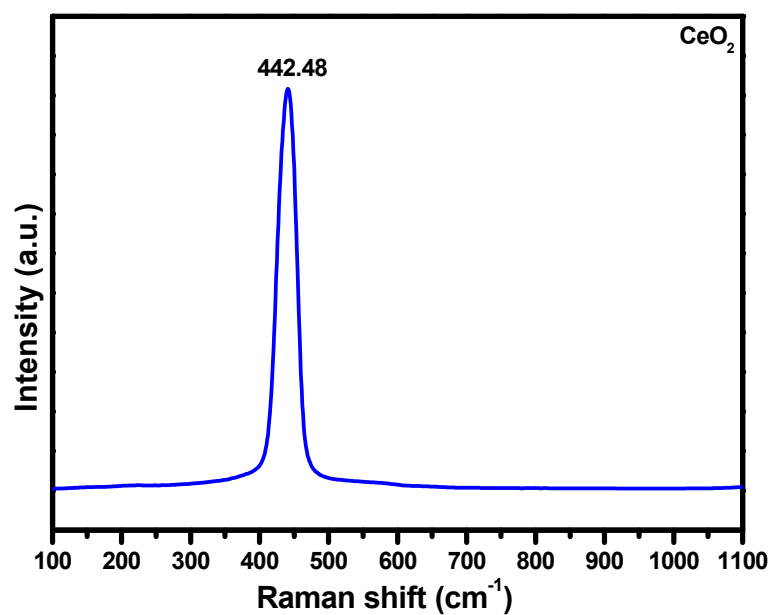Figure S1. Raman spectrum of CeO<sub>2</sub>.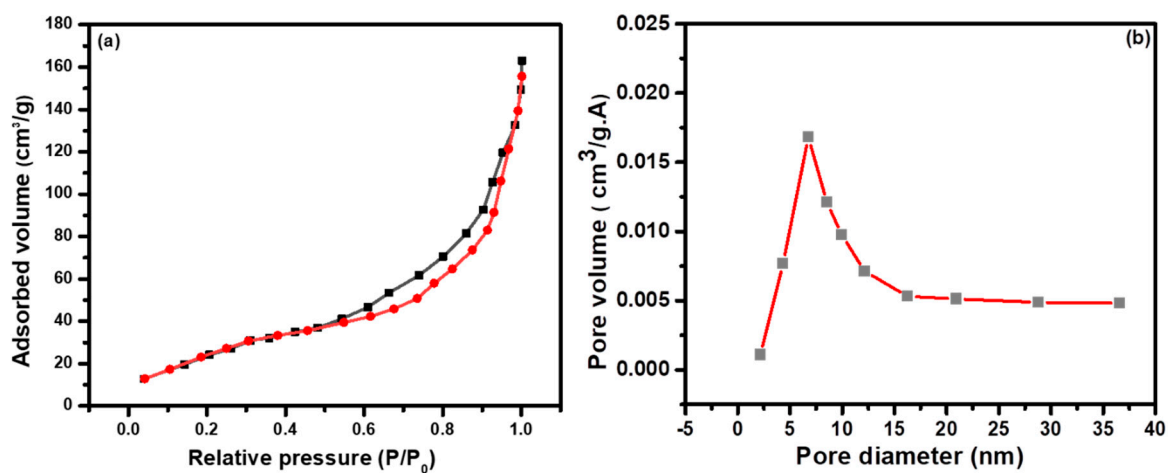Figure S2. (a) BET surface area and (b) pore size distribution curves of CeO<sub>2</sub>/MoS<sub>2</sub> composite.

Table T1. Bandgap values of prepared photocatalyst materials with CB and VB potentials.

| Sr.no. | Photocatalyst materials                      | Bandgap values (eV) | Conduction band potential (eV) | Valence band position (eV) |
|--------|----------------------------------------------|---------------------|--------------------------------|----------------------------|
| 1      | CeO <sub>2</sub>                             | 2.93                | -0.41                          | 2.52                       |
| 2      | MoS <sub>2</sub>                             | 1.60                | 0.02                           | 1.62                       |
| 3      | CeO <sub>2</sub> /MoS <sub>2</sub> composite | 2.34                | -0.23                          | 2.11                       |

**Table T2.** A comparison table showing photocatalytic hydrogen production activity using MoS<sub>2</sub>-based photo-catalysts.

| Sr. no. | Photocatalysts                                                      | Methods                    | Hydrogen production rate (μmol/h) | References |
|---------|---------------------------------------------------------------------|----------------------------|-----------------------------------|------------|
| 1       | CeO <sub>2</sub> @MoS <sub>2</sub> /g-C <sub>3</sub> N <sub>4</sub> | ultrasonic chemical method | 65.4                              | 1          |
| 2       | MoS <sub>2</sub> @SnO <sub>2</sub>                                  | Hydrothermal               | 109.3                             | 2          |
| 3       | g-C <sub>3</sub> N <sub>4</sub> /Ag/MoS <sub>2</sub>                | Photo-deposition           | 10.40                             | 3          |
| 4       | g-C <sub>3</sub> N <sub>4</sub> /MOF/MoS <sub>2</sub>               | Hydrothermal               | 52.40                             | 4          |
| 5       | CeO <sub>2</sub> /MoS <sub>2</sub>                                  | Hydrothermal               | 112.5                             | This work  |

## References

1. Zhu, C.; Wang, Y.; Jiang, Z.; Xu, F.; Xian, Q.; Sun, C.; Tong, Q.; Zou, W.; Duan, X.; Wang, S., CeO<sub>2</sub> nanocrystal-modified layered MoS<sub>2</sub>/g-C<sub>3</sub>N<sub>4</sub> as 0D/2D ternary composite for visible-light photocatalytic hydrogen evolution: Interfacial consecutive multi-step electron transfer and enhanced H<sub>2</sub>O reactant adsorption, *Appl. Catal. B Environ.* **2019**, *259*, 118072.
2. Chang, Y.; Lin, Y., MoS<sub>2</sub>@SnO<sub>2</sub> core-shell sub-microspheres for high efficient visible-light photodegradation and photocatalytic hydrogen production *Mater. Res. Bull.* **2020**, *129*, 110912.
3. Lu; Wang, H.; Zhao, X.; Kondamareddy, K.K.; Ding, J.; Li, C.; Fang, P., Highly Efficient Visible-Light-Induced Photoactivity of Z-Scheme g-C<sub>3</sub>N<sub>4</sub>/Ag/MoS<sub>2</sub> Ternary Photocatalysts for Organic Pollutant Degradation and Production of Hydrogen, *ACS Sustainable. Chem. Eng.* **2017**, *52*, 1436–1445.
4. Wang, Z.; Jin, Z.; Wang, G.; Ma, B., Efficient hydrogen production over MOFs (ZIF-67) and g-C<sub>3</sub>N<sub>4</sub> boosted with MoS<sub>2</sub> nanoparticles *Int. J. Hydrogen Energy* **2018**, *43*, 13039–13050.
